# Supplementary material for: The emerging role of drought as a regulator of dissolved organic carbon in the boreal landscapes
Source: Research Square preprint supplement (doi:10.21203/rs.3.rs-1137926/v1), 2021-12-09
Supplement: Supplementary file 1 [file ec4859fae1cc04b1b31b21ab.docx]

The emerging role of drought as a regulator of dissolved organic carbon in the boreal landscapes

***Tejshree Tiwari1, Ryan A. Sponseller2, and Hjalmar Laudon1.**

1Department of Forest Ecology and Management, Swedish University of Agricultural Sciences, SE-901 83 Umea, Sweden

2Department of Ecology and Environmental Sciences, Umea University, 901 87 Umea, Sweden.

**Supplementary Figures**

**Contents of this file**

Figures S1

Tables S1

**Introduction**

The Figure S1 presents relationship between stream water DOC concentrations and groundwater DOC concentrations. Description of each catchment landscape type and scales are found in Table S1.


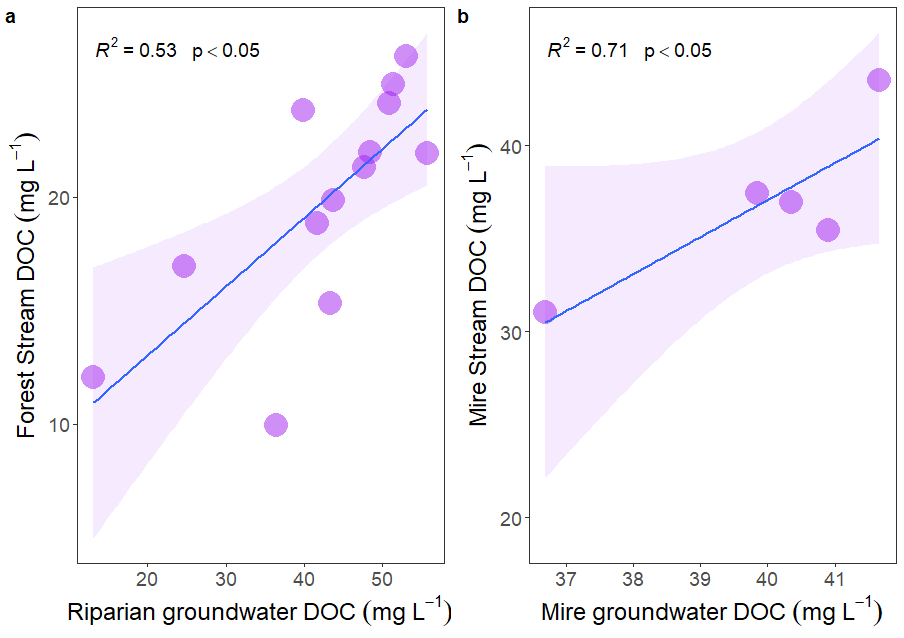


Figure S 1. Predicting the DOC concentrations in the streams in the forest (C2) and the mire (C4) using riparian zone groundwater (GW) DOC concentrations (a) and mire groundwater DOC concentrations (b).

Table S1. Areal coverage and landscape description of the 13 catchments used in this study.

| Catchments | Area (km2) | Peat | Forest |  |
| --- | --- | --- | --- | --- |
| 1 | 0.48 | 0.00 | 97.95 |  |
| 2 | 0.12 | 0.00 | 99.92 |  |
| 4 | 0.18 | 51.06 | 55.88 |  |
| 5 | 0.65 | 47.76 | 53.98 |  |
| 6 | 1.1 | 28.66 | 71.36 |  |
| 7 | 0.47 | 19.41 | 81.95 |  |
| 9 | 2.88 | 15.16 | 84.36 |  |
| 10 | 3.36 | 28.84 | 73.84 |  |
| 12 | 5.44 | 19.16 | 82.57 |  |
| 13 | 7 | 11.81 | 88.19 |  |
| 14 | 14.1 | 6.64 | 90.13 |  |
| 15 | 20.13 | 14.50 | 81.57 |  |
| 16 | 67 | 9.40 | 87.20 |  |
